# Supplementary material for: Phytoplankton Response to Increased Nickel in the Context of Ocean Alkalinity Enhancement
Source: Copernicus journal article supplement (doi:10.5194/bg-2023-130), 2023-08-21
Supplement: Supplementary file 1 [file bg-2023-130-supplement.pdf]

# Supplement

Xiaoke Xin, Giulia Faucher, Ulf Riebesell

GEOMAR Helmholtz Centre for Ocean Research Kiel, Kiel, Germany

The supplement (total of 1 page) contains 1 figure (Fig. S1).

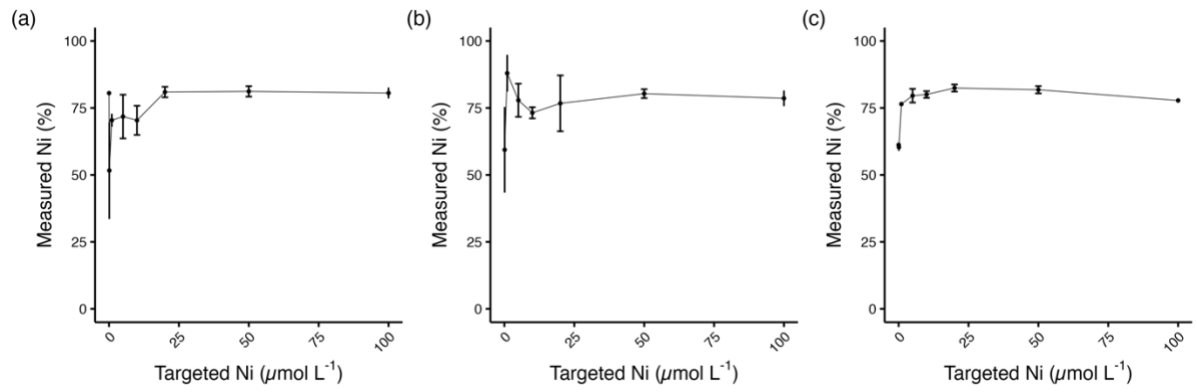

Fig. S1. Percentage of measured Ni in (a) *A. carterae*, (b) *E. huxleyi* and (c) *T. weissflogii* cultures on the final experimental day. Error bars denote standard deviations (N = 3).
